# Supplementary material for: Oversecretion and Overexpression of Nicotinamide Phosphoribosyltransferase/Pre-B Colony-Enhancing Factor/Visfatin in Inflammatory Bowel Disease Reflects the Disease Activity, Severity of Inflammatory Response and Hypoxia
Source: PubMed Central journal article supplement (PMC6337260; doi:10.3390/ijms20010166), 2019-01-04

Supplementary Figures

Fig. 1 Correlation between serum Namp1 (S-Namp1) and Rachmilewitz index (RI)(panel A) and between S-Namp1 and endoscopic score (panel B) (Spearman correlation test)

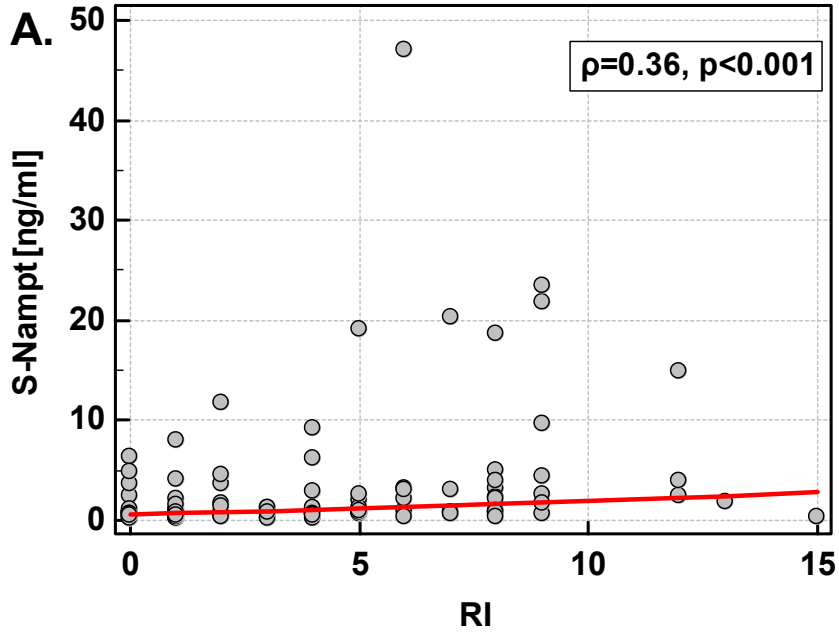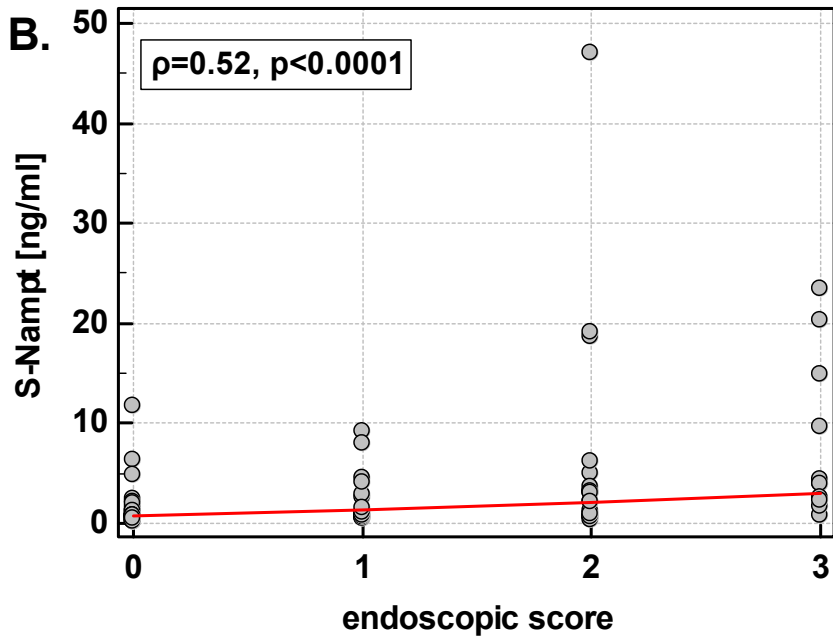

**Fig 2. Correlation of serum Namp1 (S-Namp1) with circulating cytokines in patients with active ulcerative colitis (Pearson correlation test)**

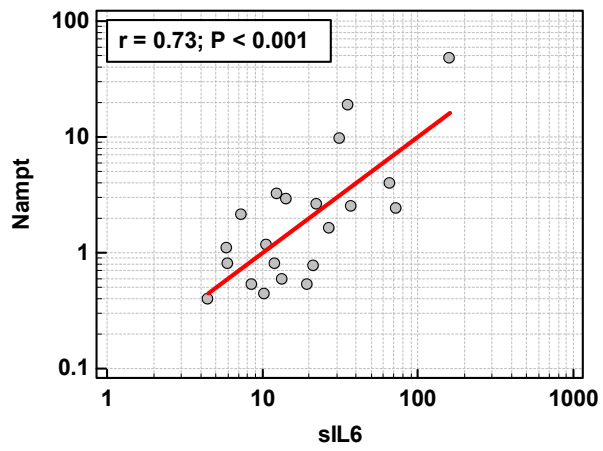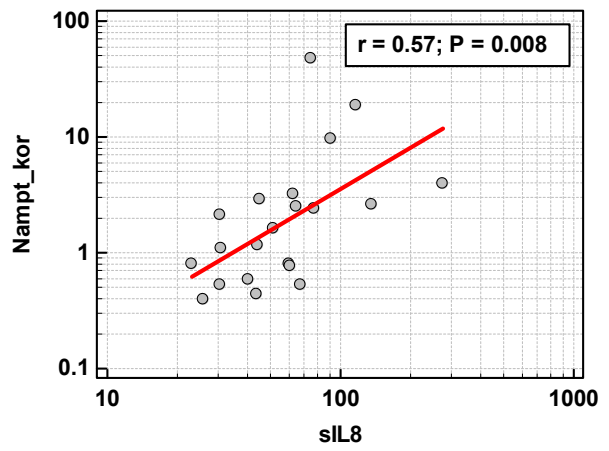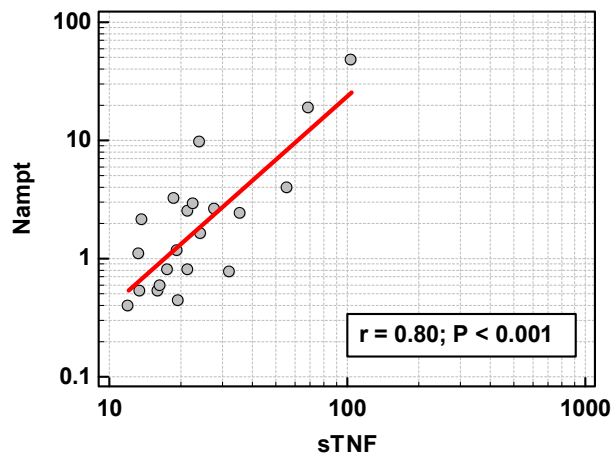

**Fig 3. Correlation of leukocyte Nampt (L-Nampt) with circulating cytokines in patients with IBD**  
(Pearson correlation test)

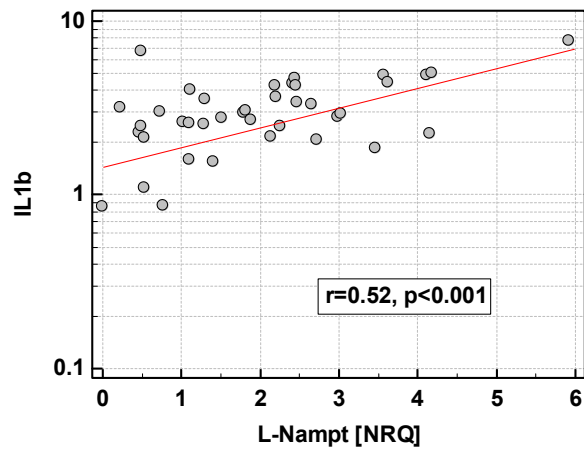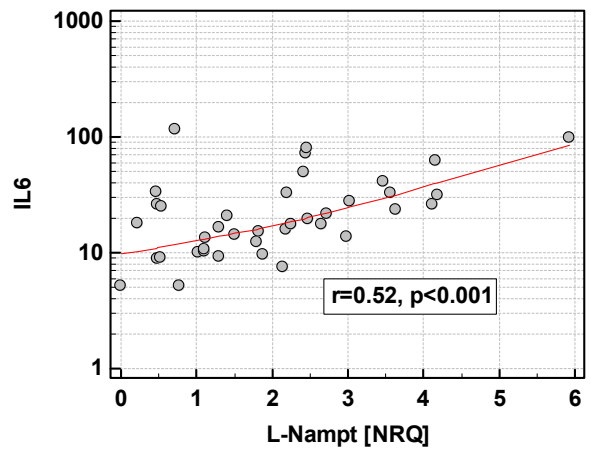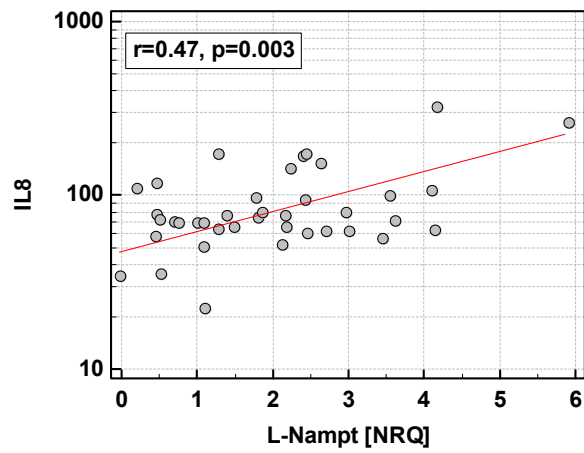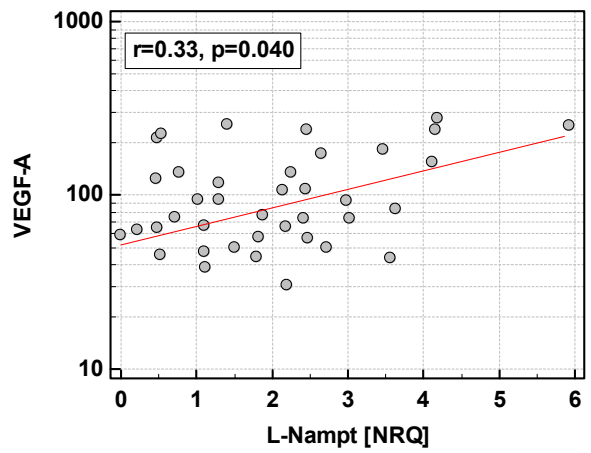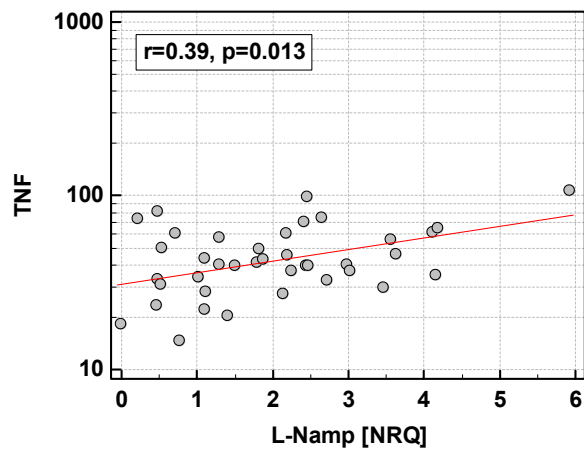

**Fig 4. Correlation of leukocyte Nampt (L-Nampt) with circulating cytokines in patients with active IBD (Pearson correlation test)**

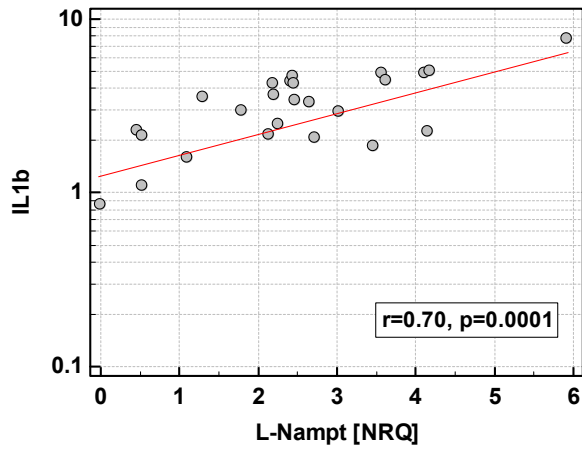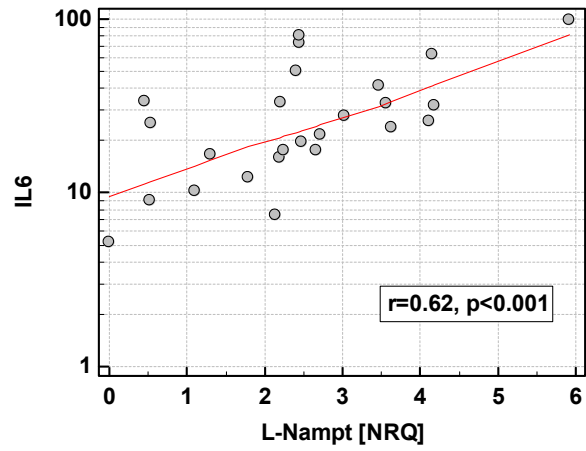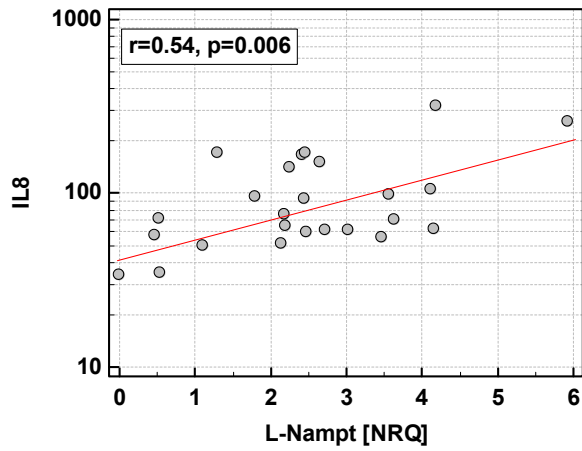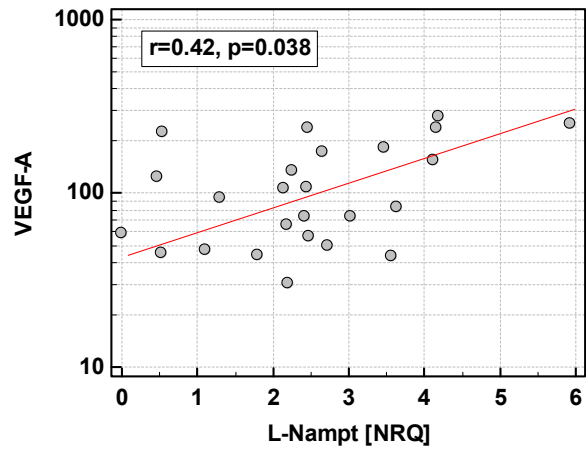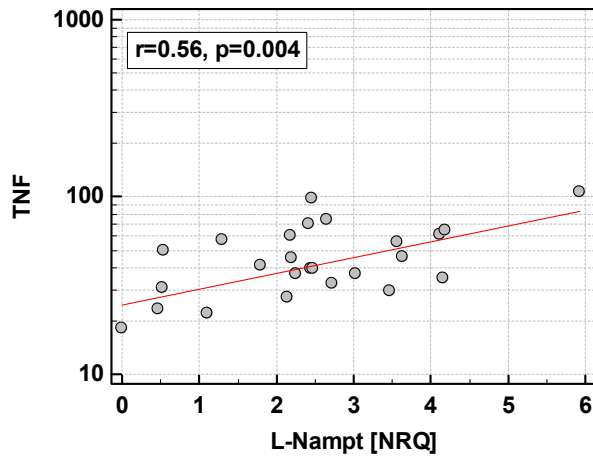

Fig 5. Correlation of leukocyte Nampt (L-Nampt) with circulating Nampt (S-Nampt) (Pearson correlation test)

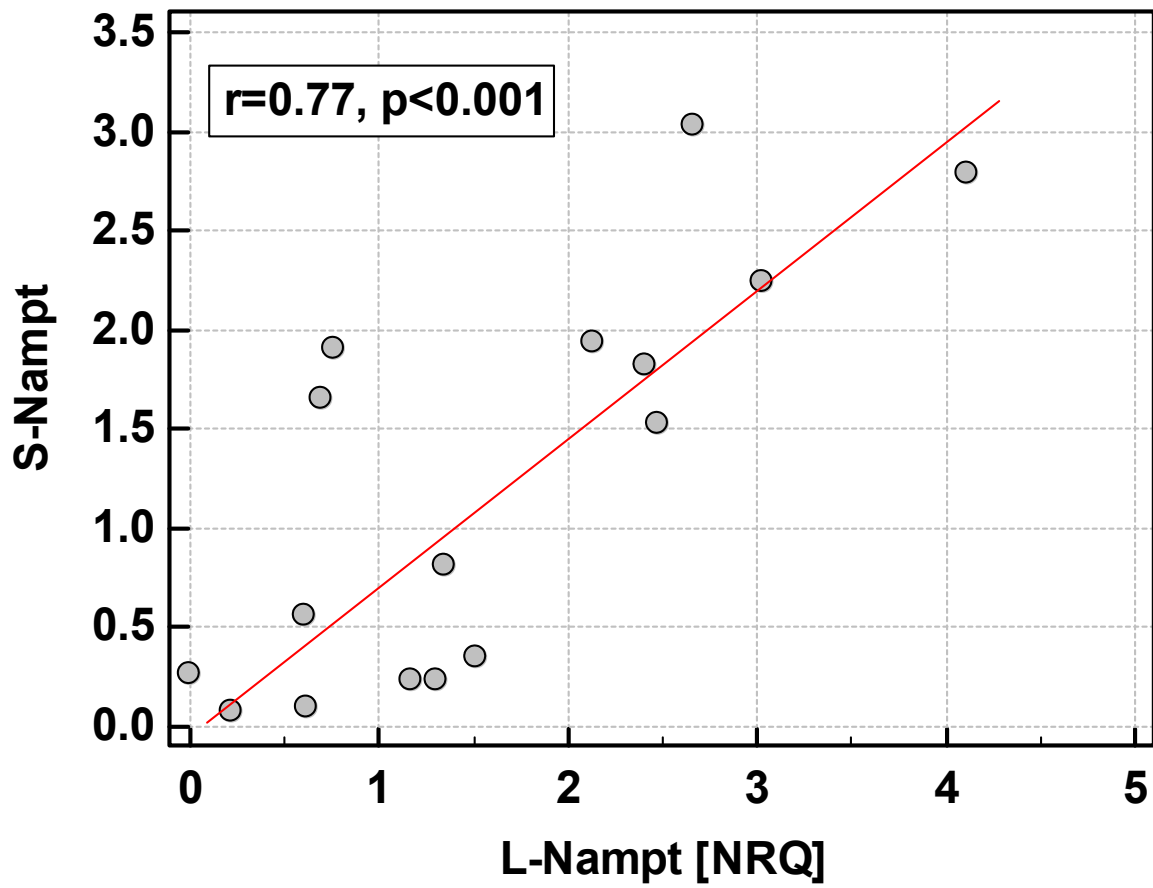

Fig. 6 Correlation of bowel Nampt (b-Nampt) with bowel expression of selected cytokines and transcription factor HIF1a in inflamed small bowel

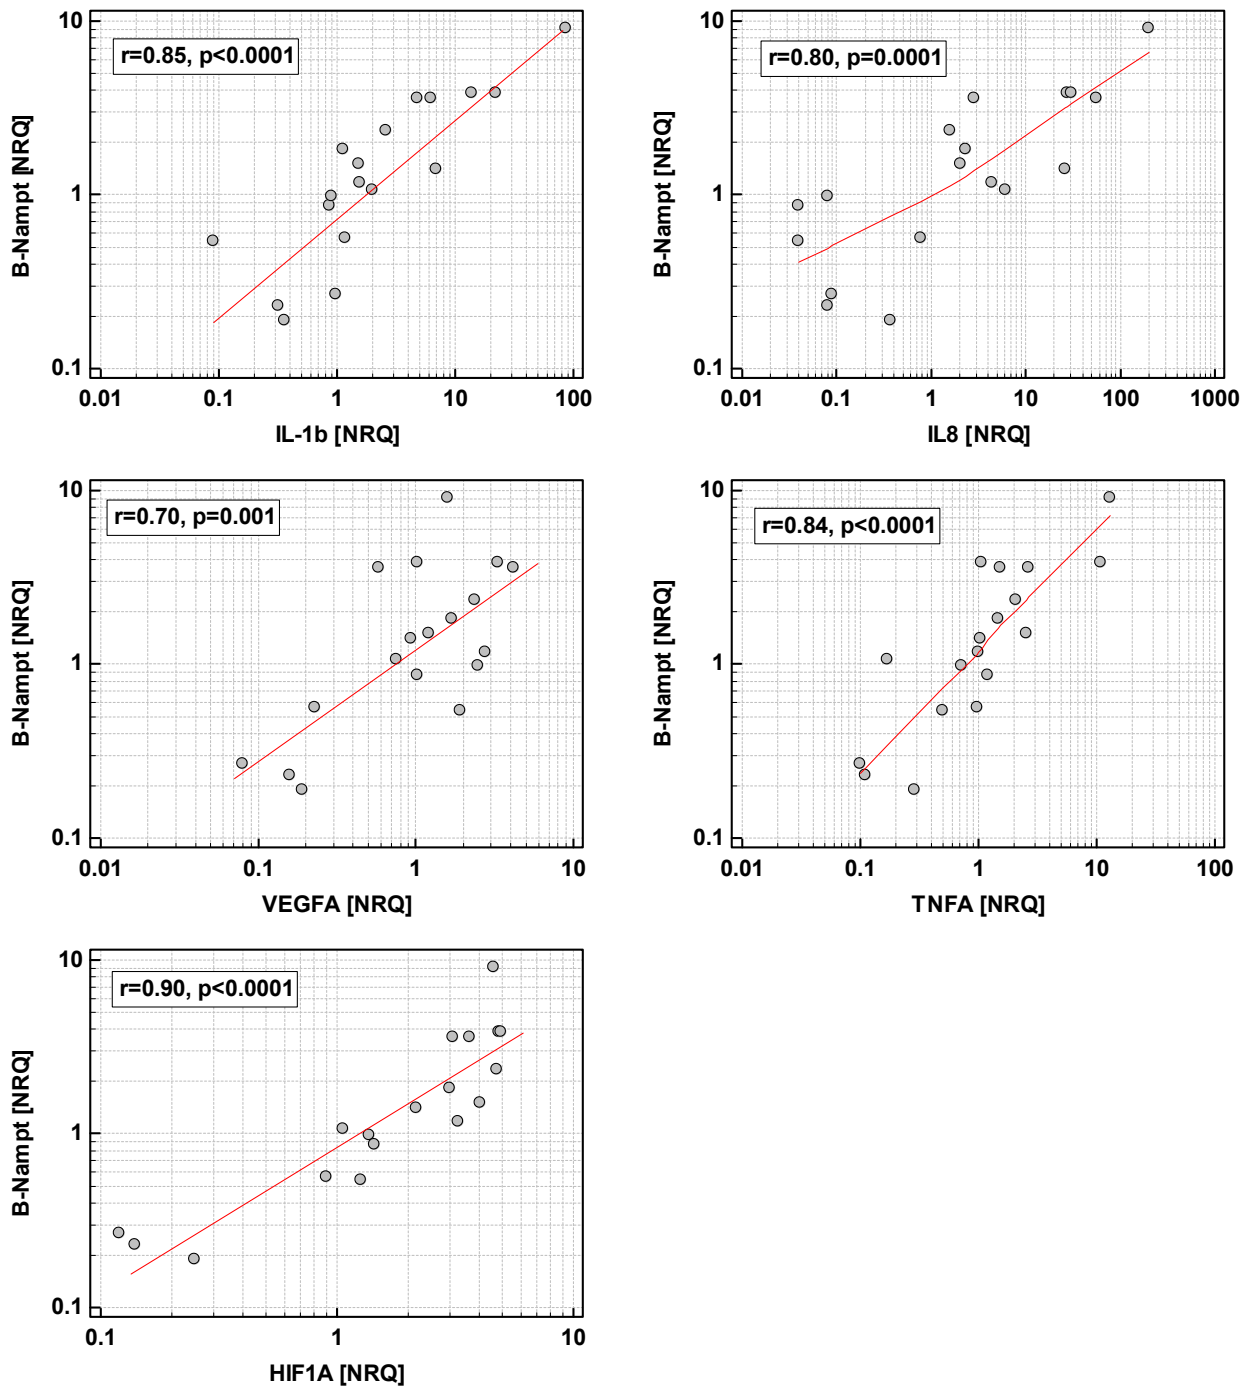

Fig. 7 Correlation of bowel Nampt (b-Nampt) with bowel expression of selected cytokines and transcription factor HIF1a in quiescent small bowel

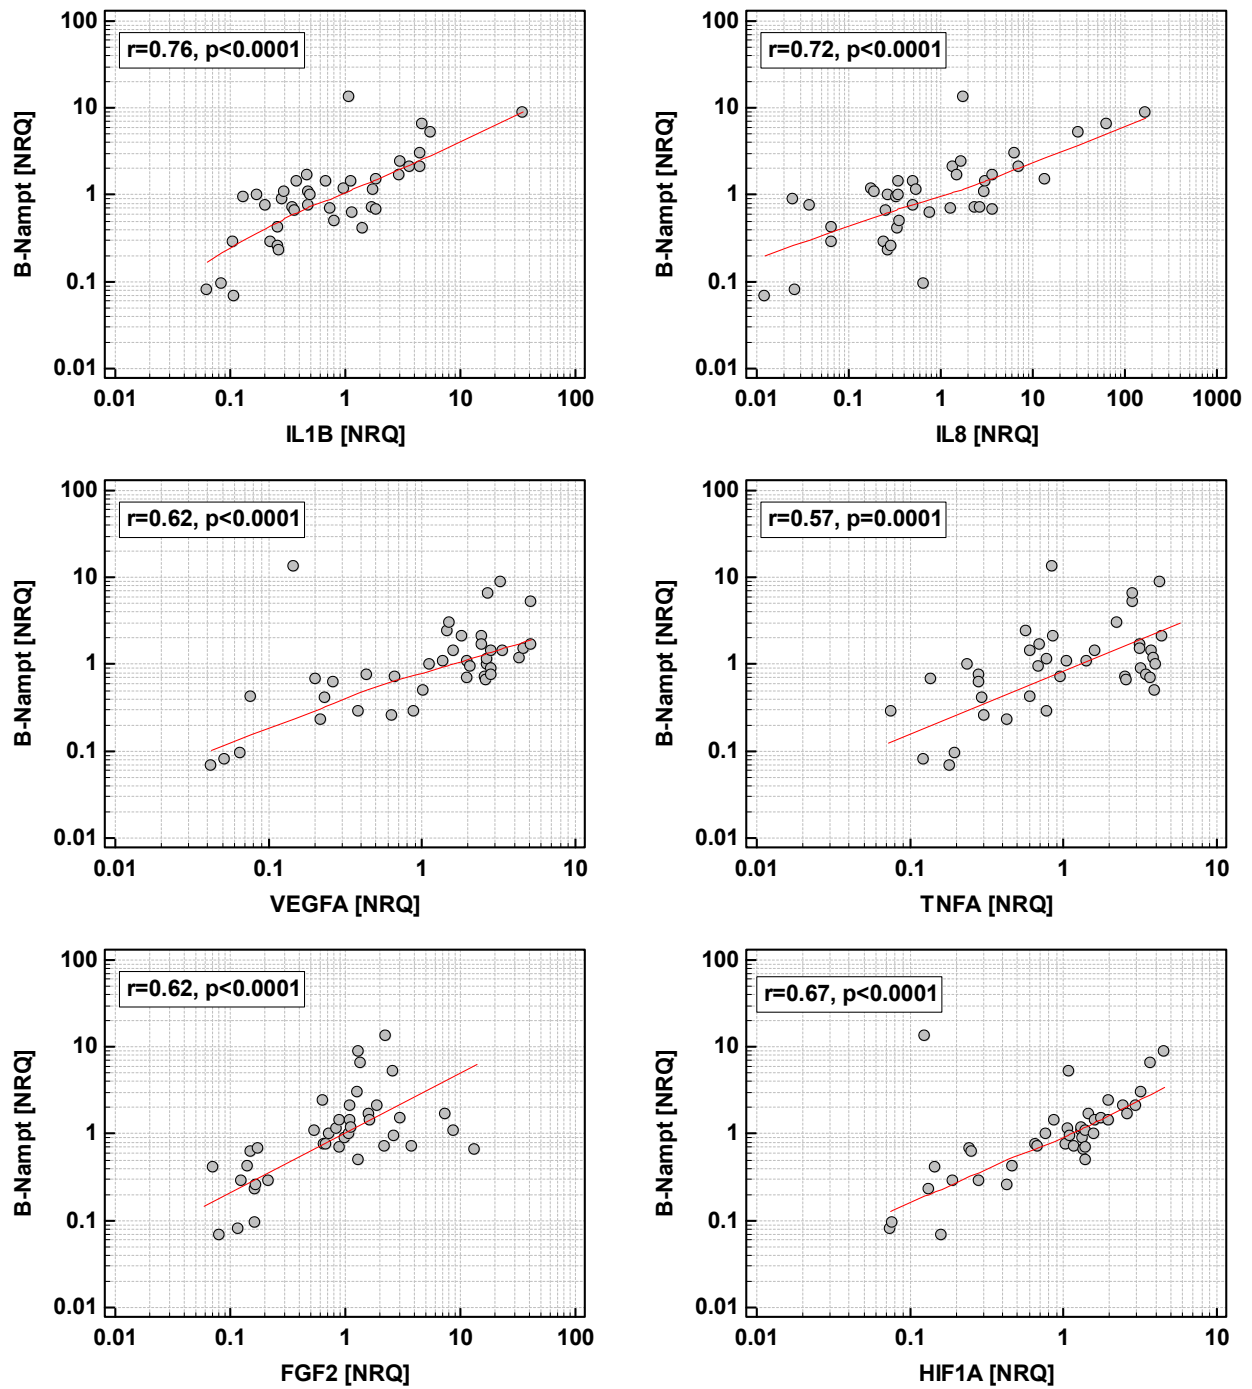

**Fig 8 Correlation of bowel Nampt (b-Nampt) with bowel expression of selected cytokines and transcription factor HIF1a in inflamed large bowel**

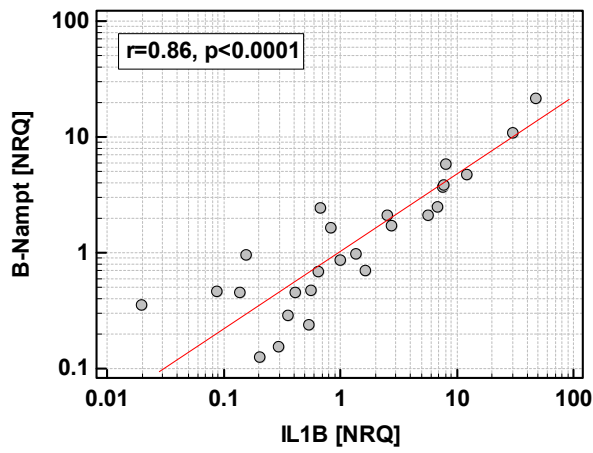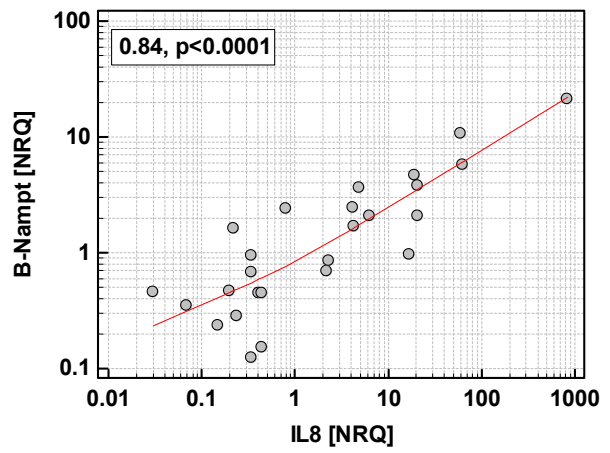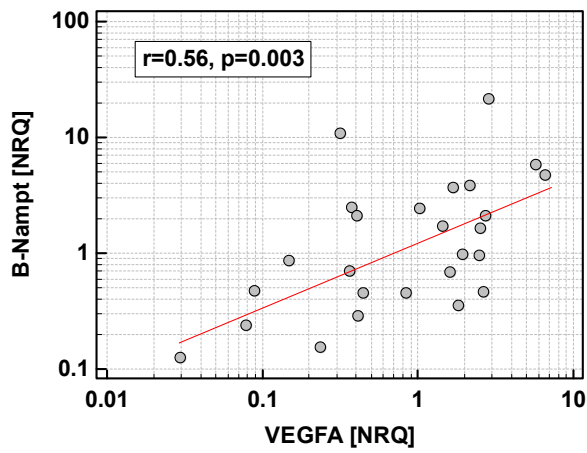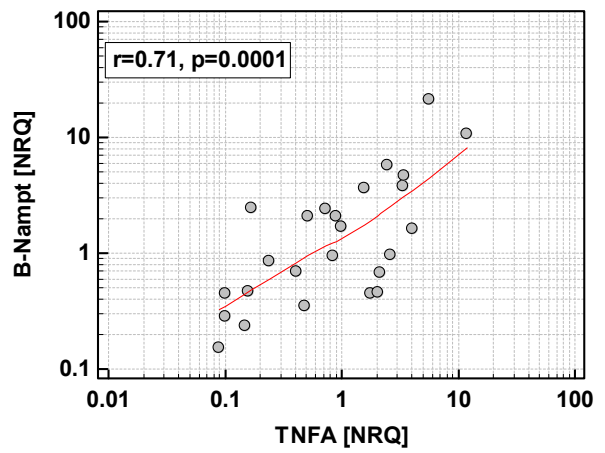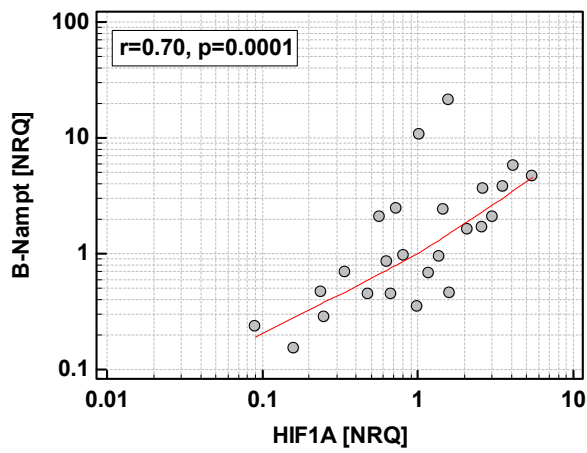



**Fig 9 Correlation of bowel Nampt (b-Nampt) with bowel expression of selected cytokines and transcription factor HIF1a in quiescent large bowel**

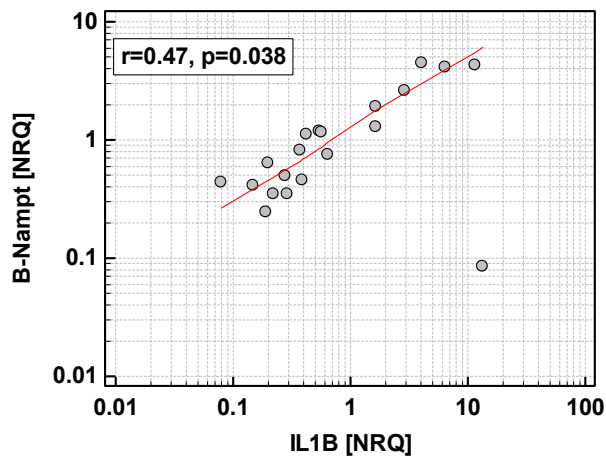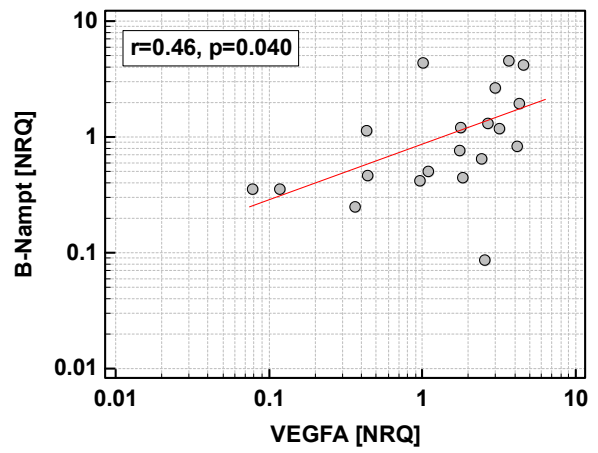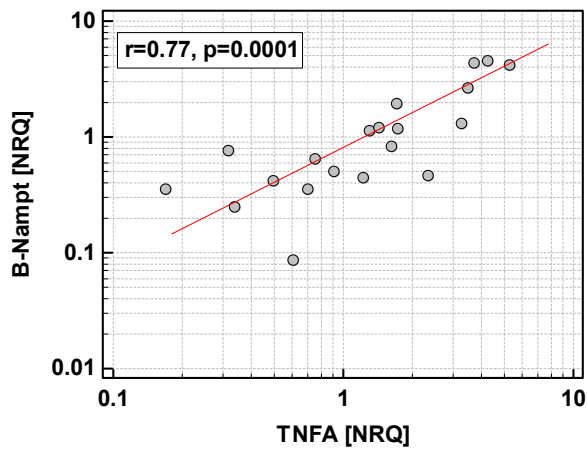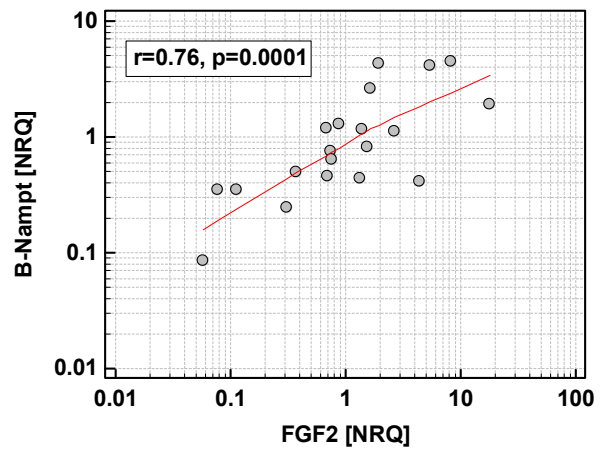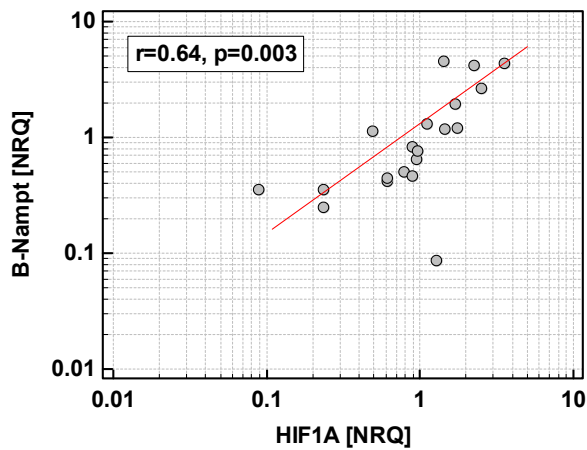

Supplement: ijms-20-00166-s001.pdf [file ijms-20-00166-s001.pdf]
